# Supplementary material for: NADPH Oxidase 5 (NOX5) Overexpression Promotes Endothelial Dysfunction via Cell Apoptosis, Migration, and Metabolic Alterations in Human Brain Microvascular Endothelial Cells (hCMEC/D3)
Source: MDPI journal article supplement (doi:10.3390/antiox11112147), 2022-10-29
Supplement: s1 [file s1]

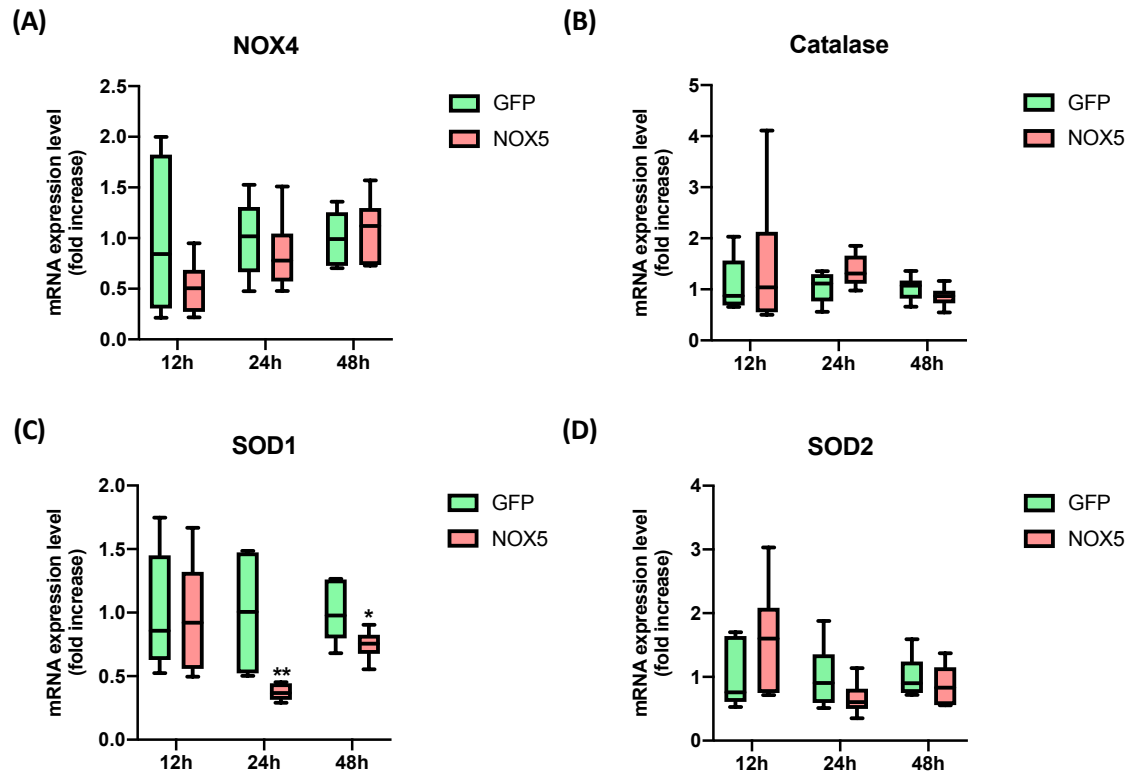

**Supplementary Figure S1. Analysis of different antioxidant systems and other NADPH oxidases at mRNA levels.** (A): NOX4 expression. (B): Catalase expression. (C): SOD1 expression. (D): SOD2 expression. NOX1 and NOX2 were not detected by qPCR in any group. GFP-infected hCMEC/D3 cells. **NOX5**: NOX5- $\beta$ -infected hCMEC/D3 cells. **NOX4**: NADPH oxidase 4. **SOD1**: superoxide dismutase 1. **SOD2**: superoxide dismutase 2. ( $n=6$ ), (\*)  $p<0.05$  vs GFP-cells, (\*\*)  $p<0.01$  vs GFP-cells. Data presented as mean $\pm$ SEM.



**Supplementary Table S1.** Analysis of NOX5 protein interactors from BIOGRID® software in hCMEC/D3 cells infected with GFP or NOX5-β encoding adenovirus. Q: quantified. NQ: not quantified. A: altered. NA: not altered.

| Protein      | Uniprot code  | Quantified | Altered  |
|--------------|---------------|------------|----------|
| ABCA2        | Q9BZC7        | NQ         | -        |
| ABCC2        | Q92887        | NQ         | -        |
| ACVR2A       | P27037        | NQ         | -        |
| ADCY3        | O60266        | NQ         | -        |
| ATP13A3      | Q9H7F0        | NQ         | -        |
| CIB1         | Q99828        | NQ         | -        |
| CLCN3        | P51790        | NQ         | -        |
| CYP51A1      | Q16850        | NQ         | -        |
| DDRGK1       | Q96HY6        | Q          | NA       |
| DHX32        | Q7L7V1        | NQ         | -        |
| DICER1       | Q9UPY3        | NQ         | -        |
| DNAJC7       | Q99615        | Q          | NA       |
| EPHX1        | P07099        | NQ         | -        |
| ESYT1        | Q9BSJ8        | Q          | NA       |
| GUCY1B3      | Q02153        | NQ         | -        |
| HSP90AA1     | P07900        | Q          | NA       |
| HSPA4        | P34932        | Q          | NA       |
| HSPA8        | P11142        | Q          | NA       |
| LRRC1        | Q9BTT6        | NQ         | -        |
| METTL9       | Q9H1A3        | NQ         | -        |
| MTHFR        | P42898        | NQ         | -        |
| NOTCH1       | P46531        | NQ         | -        |
| OSMR         | Q99650        | NQ         | -        |
| PASK         | Q96RG2        | NQ         | -        |
| PDP2         | Q9P2J9        | NQ         | -        |
| PPP1R15B     | Q5SWA1        | NQ         | -        |
| PPP6R1       | Q9UPN7        | NQ         | -        |
| PPP6R3       | Q5H9R7        | NQ         | -        |
| PRKAR1B      | P31321        | NQ         | -        |
| RETSAT       | Q6NUM9        | NQ         | -        |
| RNASEH2A     | O75792        | Q          | NA       |
| SNX14        | Q9Y5W7        | NQ         | -        |
| SPTLC2       | O15270        | NQ         | -        |
| STIM2        | Q9P246        | NQ         | -        |
| STIP1        | P31948        | Q          | NA       |
| STUB1        | Q9UNE7        | Q          | NA       |
| STX18        | Q9P2W9        | NQ         | -        |
| TBK1         | Q9UHD2        | NQ         | -        |
| TNFRSF10A    | O00220        | NQ         | -        |
| TTC4         | O95801        | Q          | NA       |
| TUBA1A       | Q71U36        | NQ         | -        |
| TUBB         | P07437        | Q          | NA       |
| TUBB4B       | P68371        | Q          | NA       |
| <b>TUBB8</b> | <b>Q3ZCM7</b> | <b>Q</b>   | <b>A</b> |
| UBE2I        | P63279        | Q          | NA       |
| UNC93B1      | Q9H1C4        | NQ         | -        |

**ABCA2:** ATP-binding cassette sub-family A member 2. **ABCC2:** ATP-binding cassette sub-family C member 2. **ACVR2A:** activin A type IIA receptor. **ADCY3:** adenylate cyclase 3. **ATP13A3:** ATPase type 13A3. **CIB1:** calcium and integrin binding protein 1. **CLCN3:** chloride channel 3. **CYP51A1:** cytochrome P450. **DDRGK1:** DDRGK domain containing protein 1. **DHX32:** DEAH box polypeptide 32. **DICER1:** dicer 1 (ribonuclease type 3). **DNAJC7:** DnaJ (Hsp40) homolog member 7. **EPHX1:** epoxide hydrolase 1. **ESYT1:** extended synaptotagmin-like protein 1. **GUCY1B3:** Guanylate cyclase 1-β3. **HSP90AA1:** Heat shock 90 kDa protein α-A1. **HSPA4:** heat shock 70 kDa protein 4. **HSPA8:** heat shock 70 kDa protein 8. **LRRC1:** leucine rich repeat containing protein 1. **METTL9:** methyltransferase like protein 9. **MTHFR:** methylenetetrahydrofolate reductase. **NOTCH1:** notch receptor 1. **OSMR:** oncostatin M receptor. **PASK:** PAS domain containing serin/threonine kinase. **PDP2:** pyruvate dehydrogenase phosphatase catalytic subunit 2. **PPP1R15B:** protein phosphatase 1 regulatory subunit 15B. **PPP6R1:** protein phosphatase 6 regulatory subunit 1. **PPP6R3:** protein phosphatase 6 regulatory subunit 3. **PRKAR1B:** protein kinase cAMP-dependent type I-β. **RETSAT:** retinol saturase. **RNASEH2A:** ribonuclease H2 subunit A. **SNX14:** sorting nexin 14. **SPTLC2:** serine

palmitoyltransferase long chain base subunit 2. **STIM2**: stromal interaction molecule 2. **STIP1**: stress-induced phosphoprotein 1. **STUB1**: E3 ubiquitin protein ligase. **STX18**: syntaxin 18. **TBK1**: TANK-binding kinase 1. **TNFRSF10A**: tumor necrosis factor receptor superfamily member 10a. **TUBA1A**: tubulin  $\alpha$ -1A. **TUBB**: tubulin  $\beta$ -1. **TUBB4B**: tubulin  $\beta$ -4B. **TTC4**: tetratricopeptide repeat domain 4. **UBE2I**: ubiquitin-conjugating enzyme E2I. **UNC93B1**: unc-93 homolog B1.

**Supplementary Table S2.** GO-terms related with proliferative and apoptotic processes altered in NOX5- $\beta$  infected hCMEC/D3 cells according to Reactome® software. GO-terms are classified by the specific phenotypic alteration and cellular pathway in which they are involved.

| Phenotypic alteration              | Cellular pathway              | GO-term nº    | GO-term description                                                          |
|------------------------------------|-------------------------------|---------------|------------------------------------------------------------------------------|
| Genomic instability                | Chromatin assembly            | R-HSA-73886   | Chromosome Maintenance                                                       |
|                                    |                               | R-HSA-4551638 | SUMOylation of chromatin organization proteins                               |
|                                    |                               | R-HSA-157579  | Telomere Maintenance                                                         |
|                                    |                               | R-HSA-180786  | Extension of Telomeres                                                       |
|                                    |                               | R-HSA-171319  | Telomere Extension By Telomerase                                             |
|                                    |                               | R-HSA-2559586 | DNA Damage/Telomere Stress Induced Senescence                                |
|                                    | Aberrant transcription        | R-HSA-2559584 | Formation of Senescence-Associated Heterochromatin Foci (SAHF)               |
|                                    |                               | R-HSA-4615885 | SUMOylation of DNA replication proteins                                      |
|                                    |                               | R-HSA-927802  | Nonsense-Mediated Decay (NMD)                                                |
|                                    | Cell senescence and apoptosis | R-HSA-975957  | Nonsense Mediated Decay (NMD) enhanced by the Exon Junction Complex (EJC)    |
|                                    |                               | R-HSA-975956  | Nonsense Mediated Decay (NMD) independent of the Exon Junction Complex (EJC) |
|                                    |                               | R-HSA-2559583 | Cellular Senescence                                                          |
| General gene expression alteration | General                       | R-HSA-109581  | Apoptosis                                                                    |
|                                    |                               | R-HSA-75153   | Apoptotic execution phase                                                    |
|                                    |                               | R-HSA-140342  | Apoptosis induced DNA fragmentation                                          |
|                                    |                               | R-HSA-5357801 | Programmed Cell Death                                                        |
|                                    |                               | R-HSA-15869   | Metabolism of nucleotides                                                    |
|                                    |                               | R-HSA-8953854 | Metabolism of RNA                                                            |
|                                    |                               | R-HSA-211000  | Gene Silencing by RNA                                                        |
|                                    | mRNA maturation and transport | R-HSA-72312   | rRNA processing                                                              |
|                                    |                               | R-HSA-72306   | tRNA processing                                                              |
|                                    |                               | R-HSA-72766   | Translation                                                                  |
|                                    |                               | R-HSA-9609507 | Protein localization                                                         |
|                                    |                               | R-HSA-191859  | snRNP Assembly                                                               |
|                                    |                               | R-HSA-72202   | Transport of Mature Transcript to Cytoplasm                                  |
|                                    |                               | R-HSA-159231  | Transport of Mature mRNA Derived from an Intronless Transcript               |
|                                    | Ribosome biogenesis           | R-HSA-159234  | Transport of Mature mRNAs Derived from Intronless Transcripts                |
|                                    |                               | R-HSA-159230  | Transport of the SLBP Dependant Mature mRNA                                  |
|                                    |                               | R-HSA-159227  | Transport of the SLBP independent Mature mRNA                                |
|                                    |                               | R-HSA-159236  | Transport of Mature mRNA derived from an Intron-Containing Transcript        |
|                                    |                               | R-HSA-72312   | rRNA processing                                                              |
|                                    | tRNA processing               | R-HSA-8868773 | rRNA processing in the nucleus and cytosol                                   |
|                                    |                               | R-HSA-6791226 | Major pathway of rRNA processing in the nucleus and cytosol                  |
|                                    |                               | R-HSA-191859  | snRNP Assembly                                                               |
|                                    |                               | R-HSA-72689   | Formation of a pool of free 40S subunits                                     |
|                                    |                               | R-HSA-72706   | GTP hydrolysis and joining of the 60S ribosomal subunit                      |
|                                    | Protein translation           | R-HSA-194441  | Metabolism of non-coding RNA                                                 |
|                                    |                               | R-HSA-72306   | tRNA processing                                                              |
|                                    |                               | R-HSA-6784531 | tRNA processing in the nucleus                                               |
|                                    |                               | R-HSA-72766   | Translation                                                                  |
|                                    |                               | R-HSA-72613   | Eukaryotic Translation Initiation                                            |
| Cell proliferation                 | Mitosis                       | R-HSA-72737   | Cap-dependent Translation Initiation                                         |
|                                    |                               | R-HSA-156902  | Peptide chain elongation                                                     |
|                                    |                               | R-HSA-156842  | Eukariotic translation elongation                                            |
|                                    |                               | R-HSA-72764   | Eukariotic translation termination                                           |
|                                    |                               | R-HSA-9609507 | Protein localization                                                         |
|                                    |                               | R-HSA-2990846 | SUMOylation                                                                  |
|                                    |                               | R-HSA-4570464 | SUMOylation of RNA binding proteins                                          |
|                                    |                               | R-HSA-3232142 | SUMOylation of ubiquitylation proteins                                       |
|                                    |                               | R-HSA-3108232 | SUMO E3 ligases SUMOylate target proteins                                    |
|                                    |                               | R-HSA-1640170 | Cell cycle                                                                   |
|                                    |                               | R-HSA-69278   | Cell Cycle, Mitotic                                                          |
|                                    |                               | R-HSA-1852241 | Organelle biogenesis and maintenance                                         |
|                                    |                               | R-HSA-68875   | Mitotic Prophase                                                             |
|                                    |                               | R-HSA-2980766 | Nuclear Envelope Breakdown                                                   |
|                                    |                               | R-HSA-3301854 | Nuclear Pore Complex (NPC) Disassembly                                       |
|                                    |                               | R-HSA-380320  | Recruitment of NuMA to mitotic centrosomes                                   |
|                                    |                               | R-HSA-453274  | Mitotic G2-G2/M phases                                                       |
|                                    |                               | R-HSA-69275   | G2/M Transition                                                              |
|                                    |                               | R-HSA-68886   | M Phase                                                                      |
|                                    |                               | R-HSA-2995410 | Nuclear Envelope (NE) Reassembly                                             |

**Supplementary Table S3.** GO-terms related with metabolic alterations in NOX5- $\beta$  infected hCMEC/D3 cells according to Reactome® software. GO-terms are classified by the specific phenotypic alteration and cellular pathway in which they are involved.

| Phenotypic alteration         | Cellular pathway   | GO-term nº    | GO-term description                                                                                                |
|-------------------------------|--------------------|---------------|--------------------------------------------------------------------------------------------------------------------|
| Cell energetics dysregulation | General            | R-HSA-9711097 | Cellular response to starvation                                                                                    |
|                               |                    | R-HSA-70326   | Glucose metabolism                                                                                                 |
|                               | Glucose metabolism | R-HSA-71387   | Metabolism of carbohydrates                                                                                        |
|                               |                    | R-HSA-70171   | Glycolysis                                                                                                         |
|                               |                    | R-HSA-70263   | Gluconeogenesis                                                                                                    |
|                               |                    | R-HSA-1445148 | Translocation of SLC2A4 (GLUT4) to the plasma membrane                                                             |
|                               |                    | R-HSA-170822  | Regulation of Glucokinase by Glucokinase Regulatory Protein                                                        |
|                               | Protein metabolism | R-HSA-9633012 | Response of EIF2AK4 (GCN2) to amino acid deficiency                                                                |
|                               |                    | R-HSA-71291   | Metabolism of amino acids and derivatives                                                                          |
|                               |                    | R-HSA-9646399 | Aggrephagy                                                                                                         |
|                               | Autophagy          | R-HSA-9612973 | Autophagy                                                                                                          |
|                               |                    | R-HSA-9663891 | Selective autophagy                                                                                                |
| Mitochondrial metabolism      |                    | R-HSA-1632852 | Macroautophagy                                                                                                     |
|                               |                    | R-HSA-1852241 | Organelle biogenesis and maintenance                                                                               |
|                               |                    | R-HSA-5368287 | Mitochondrial translation                                                                                          |
|                               |                    | R-HSA-5368286 | Mitochondrial translation initiation                                                                               |
|                               |                    | R-HSA-5389840 | Mitochondrial translation elongation                                                                               |
|                               |                    | R-HSA-5419276 | Mitochondrial translation termination                                                                              |
|                               |                    | R-HSA-1268020 | Mitochondrial protein import                                                                                       |
|                               | ATP synthesis      | R-HSA-611105  | Respiratory electron transport                                                                                     |
|                               |                    | R-HSA-6799198 | Complex I biogenesis                                                                                               |
|                               |                    | R-HSA-1428517 | The citric acid (TCA) cycle and respiratory electron transport                                                     |
|                               |                    | R-HSA-163200  | Respiratory electron transport, ATP synthesis by chemiosmotic coupling, and heat production by uncoupling proteins |
|                               |                    | R-HSA-156827  | L13a-mediated translational silencing of Ceruloplasmin expression                                                  |

**Supplementary Table S4.** GO-terms related with cell migration in NOX5- $\beta$  infected hCMEC/D3 cells according to Reactome® software. GO-terms are classified by the specific phenotypic alteration and cellular pathway in which they are involved.

| Phenotypic alteration | Cellular pathway       | GO-term nº    | GO-term description                                |
|-----------------------|------------------------|---------------|----------------------------------------------------|
| Cell migration        | Conformational changes | R-HSA-5617833 | Cilium Assembly                                    |
|                       |                        | R-HSA-9711097 | Axon guidance                                      |
|                       |                        | R-HSA-373755  | Semaphorin interactions                            |
|                       |                        | R-HSA-399956  | CRMPs in Sema3A signaling                          |
|                       |                        | R-HSA-437239  | Recycling pathway of L1                            |
|                       |                        | R-HSA-194315  | Signaling by Rho GTPases                           |
|                       |                        | R-HSA-9716542 | Signaling by Rho GTPases, Miro GTPases and RHOBTB3 |

**Supplementary Table S5.** E2f transcription factor isoforms expression in NOX5- $\beta$  infected HAEC transcriptomic array after 12, 18 and 24 hours of infection.

|             |              |          | 12h  |           | 18h  |           | 24h  |           |
|-------------|--------------|----------|------|-----------|------|-----------|------|-----------|
| Gene        | GeneID       | Database | FC   | adj.P.Val | FC   | adj.P.Val | FC   | adj.P.Val |
| <i>E2f3</i> | NM_001949    | RefSeq   | 1.20 | 0.0138*   | 1.33 | 0.0067*   | 1.34 | 0.0049*   |
| <i>E2f6</i> | NM_001278276 | RefSeq   | 1.42 | 0.0002*   | 1.30 | 0.0336*   | 1.44 | 0.0038*   |
| <i>E2f7</i> | NM_001256371 | RefSeq   | 1.64 | p<0.0001* | 4.58 | p<0.0001* | 5.59 | p<0.0001* |
| <i>E2f8</i> | NM_001256371 | RefSeq   | 0.80 | 0,0011*   | 0.69 | 0.0002*   | 0.74 | 0.0010*   |

***E2f3***: *E2f* transcription factor 3. ***E2f6***: *E2f* transcription factor 6. ***E2f7***: *E2f* transcription factor 7. ***E2f8***: *E2f* transcription factor 8.



**Supplementary Table S6.** Rho GTPase family members expression in NOX5- $\beta$  infected HAEC transcriptomic array after 12, 18 and 24 hours of infection.

|             |                 |          | 12h  |           | 18h   |           | 24h  |           |
|-------------|-----------------|----------|------|-----------|-------|-----------|------|-----------|
| Gene        | GeneID          | Database | FC   | adj.P.Val | FC    | adj.P.Val | FC   | adj.P.Val |
| <i>RND1</i> | ENST00000548445 | ENSEMBL  | 8.51 | p<0.0001* | 10.74 | p<0.0001* | 9.53 | p<0.0001* |
| <i>RND2</i> | NM_005440       | RefSeq   | 1.00 | 0.9997    | 0.94  | 0.7630    | 1.00 | 0.9874    |
| <i>RND3</i> | NM_001254738    | RefSeq   | 1.47 | p<0.0001* | 1.79  | p<0.0001* | 1.82 | p<0.0001* |

*RND1*: Rho family GTPase 1. *RND2*: Rho family GTPase 2. *RND3*: Rho family GTPase 3.
